# Supplementary material for: Magnetotelluric investigation in the High Agri Valley (southern Apennine, Italy)
Source: Copernicus journal article supplement (doi:10.5194/nhess-15-843-2015), 2015-04-13
Supplement: Supplementary file 1 [file nhess-15-843-2015-supplement.pdf]

Supplement of Nat. Hazards Earth Syst. Sci., 15, 843–852, 2015  
<http://www.nat-hazards-earth-syst-sci.net/15/843/2015/>  
doi:10.5194/nhess-15-843-2015-supplement  
© Author(s) 2015. CC Attribution 3.0 License.

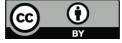

Natural Hazards  
and Earth System  
Sciences

Open Access

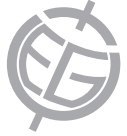

*Supplement of*

## **Magnetotelluric investigation in the High Agri Valley (southern Apennine, Italy)**

**M. Balasco et al.**

*Correspondence to:* M. Balasco ([marianna.balasco@imaa.cnr.it](mailto:marianna.balasco@imaa.cnr.it))

1 **Supplementary materials**

2

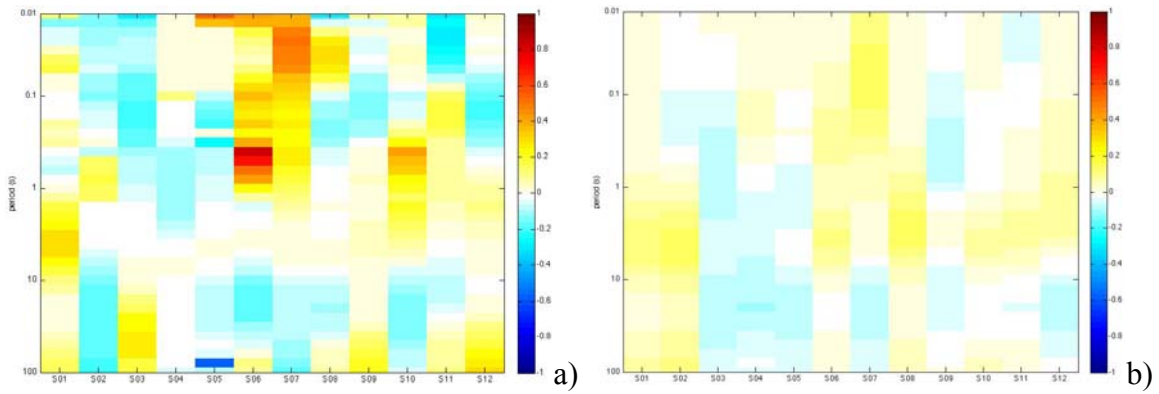

4

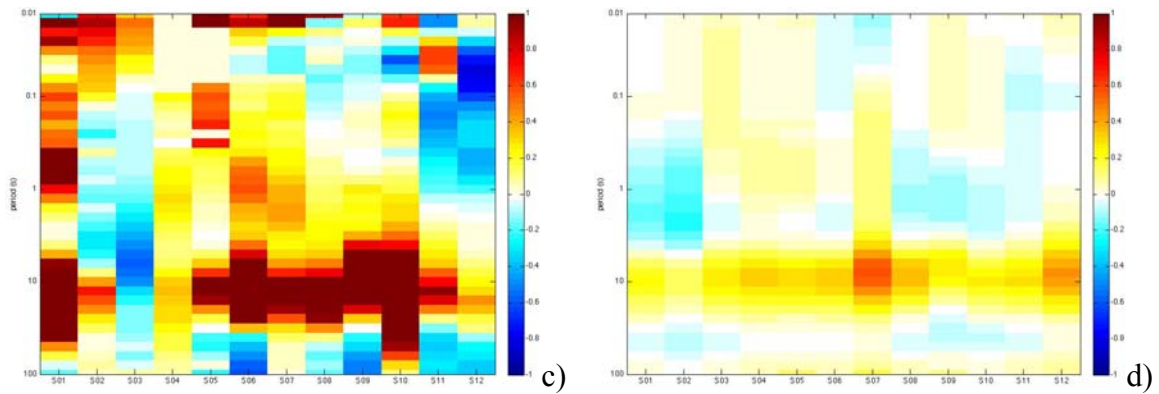

6 **Figure S1.** Normalized misfits between raw data (observed data) and the response of the  
7 model (calculated data) for electrical resistivity (panel a and b) and phase (panel c and d) for  
8 both modes (TE panel a and c; TM panel b and d), plotted in pseudosection format. Misfit  
9 sections are plotted versus site number.

10

11

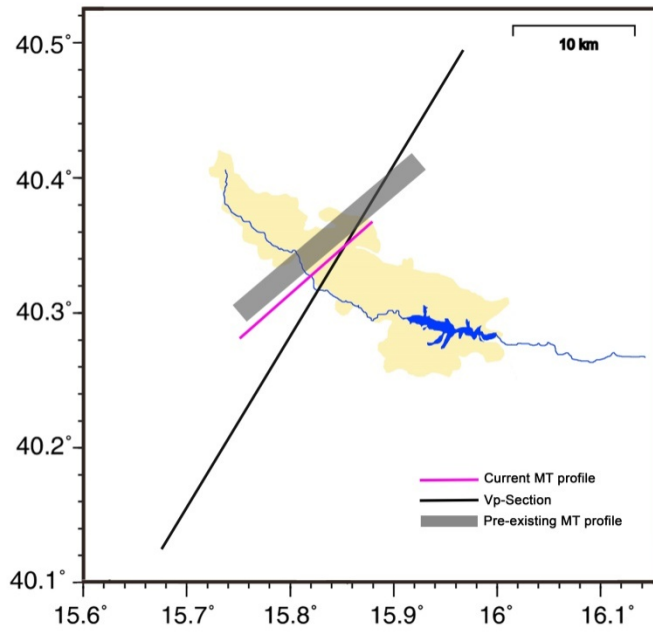

1

2

3 **Figure S2.** Location of pre-existing geophysical investigation (Vp-section, black line, in  
4 Valoroso et al., 2011, and MT profile, grey band, in Dell'Aversana, 2003) in a sketch of Agri  
5 Valley.

6

7
